# Supplementary material for: Amorphous MoaZr0.8Ox-500 catalyzed selective oxidation of sulfides to sulfoxides mediated by 1O2 from direct heterolytic cleavage of H2O2
Source: Royal Society of Chemistry journal article supplement (doi:10.1039/d4qi02008a), 2024-01-01
Supplement: d4qi02008a1.pdf [file d4qi02008a1.pdf]

## **Amorphous $\text{Mo}_a\text{Zr}_{0.8}\text{O}_x$ -500 catalyzed selective oxidation of sulfides to sulfoxides mediated by $^1\text{O}_2$ from direct heterolytic cleavage $\text{H}_2\text{O}_2$**

Tong Li<sup>a</sup>, Jiaheng Qin<sup>a</sup>, Xueyao Zhang<sup>c</sup>, Xiaoqi Tang<sup>a</sup>, Mingzhe Lv<sup>a</sup>, Weiwen Mao<sup>a</sup>, Linkun Dong<sup>a</sup>, Tongtong Fan<sup>a</sup>, Yu Long<sup>\*a, b</sup>, Jiantai Ma<sup>\*a, b</sup>

<sup>a</sup> State Key Laboratory of Applied Organic Chemistry (SKLAOC), Gansu Provincial Engineering Laboratory for Chemical Catalysis, College of Chemistry and Chemical Engineering, Lanzhou University, Lanzhou 730000, P. R. China.

<sup>b</sup> MOE Frontiers Science Center for Rare Isotopes, Lanzhou University, Lanzhou 730000, P. R. China.

<sup>c</sup> School of Life Sciences, Lanzhou University, Lanzhou 730000, P. R. China.

\* E-mail: longyu@lzu.edu.cn (Yu Long), majiantai@lzu.edu.cn (Jiantai Ma)

## Experimental details

### 1. Materials

Zirconium hydroxide ( $\text{Zr}(\text{OH})_4$ , 97%), ammonium molybdate tetrahydrate ( $(\text{NH}_4)_6\text{Mo}_7\text{O}_{24}\cdot 4\text{H}_2\text{O}$ , 99%) and Molybdenum trioxide ( $\text{MoO}_3$ , 99.5%) were purchased commercially from Macklin. Methyl phenyl sulfide, 4-Methoxyphenyl methyl sulfide, 4-Aminophenyl methyl sulfide, 4-Fluorophenyl methyl sulfide, 4-Chlorophenyl methyl sulfide, 2-Chlorophenyl methyl sulfide, 4-(Methylthio)benzaldehyde, 4-Acetylphenyl methyl sulfide, Diphenyl sulfide, Diethyl sulfide, Dipropyl sulfide, Dibutyl sulfide, 2-Chloroethyl ethyl sulfide were purchased commercially from Macklin. 4-Nitrophenyl methyl sulfide and (4-Methylphenyl) methyl sulfide were purchased commercially from Leyan. 4-(Methylthio)benzyl alcohol and phenyl benzyl sulfide were purchased commercially from Bidepharmatech. Ammonium metatungstate ( $(\text{NH}_4)_6\text{H}_2\text{W}_{12}\text{O}_{40}\cdot x\text{H}_2\text{O}$ ) and Nickel chloride hexahydrate ( $\text{NiCl}_2\cdot 6\text{H}_2\text{O}$ ) were purchased commercially from Aladdin. Ammonium chromate ( $(\text{NH}_4)_2\text{CrO}_4$ ), lanthanum nitrate hexahydrate ( $\text{La}(\text{NO}_3)_3\cdot 6\text{H}_2\text{O}$ ), cerium chloride hexahydrate ( $\text{CeCl}_3\cdot 6\text{H}_2\text{O}$ ), cobalt chloride hexahydrate ( $\text{CoCl}_2\cdot 6\text{H}_2\text{O}$ ), 1,3-diphenylisobenzofuran (DPBF, 97%) and nitrotetrazolium blue chloride (NBT, 98%) were purchased commercially from Macklin. Ferric nitrate nonahydrate ( $\text{Fe}(\text{NO}_3)_3\cdot 9\text{H}_2\text{O}$ ) and calcium hydroxide ( $\text{Ca}(\text{OH})_2$ ) were purchased commercially from Kelong. Cupric nitrate ( $\text{Cu}(\text{NO}_3)_2$ ) and aluminum hydroxide ( $\text{Al}(\text{OH})_3$ ) were purchased commercially from Damao. All solvents were analytically pure and not further purified.

## 2. Characterization

Gas chromatography (GC) analysis was conducted on an Agilent GC 8090 instrument equipped with a flame ionization detector (FID) and an HP-5MS capillary column (30 m, 0.25 mm i.d., 0.25  $\mu\text{m}$  film thicknesses) using nitrogen as the carrier gas. Gas chromatography-mass spectrometry (GC-MS) analysis was performed on an Agilent 5977C GC/MSD instrument with an Agilent HP-5975 with triple-axis detector and HP-5 capillary column using helium as the carrier gas.

The crystal structure of the catalysts was investigated by powder X-ray diffraction (XRD) using a Rigaku D/max-2400 diffractometer with Cu-K $\alpha$  radiation. The samples were scanned at a rate of 5° min<sup>-1</sup> at room temperature.

The morphological characteristics of the catalysts were analyzed using scanning electron microscopy (SEM, S-6800) and transmission electron microscopy (TEM, FEI Talos F200s).

The surface and structural properties of the samples were investigated using the N<sub>2</sub> adsorption-desorption isotherm (ASAP2020) at liquid nitrogen temperature (77 K). Prior to measurement, all samples were degassed under vacuum at 473 K for 6 h. The specific surface area of the catalysts was determined by the Brunel-Emmett-Teller (BET) method. Pore size distributions were calculated from the adsorption curves using non-local density functional theory (NLDFT).

X-ray photoelectron spectroscopy (XPS) was conducted on a PH-5702 instrument with an anode of Mg K $\alpha$  ( $h\nu = 1253.6$  eV) and a base pressure of  $5 \times 10^{-8}$  mbar. The binding energy (BE) was adjusted for the C1s peak of carbon at 284.6 eV.

Raman spectroscopy was recorded on a Laser Micro-Raman spectrometer system using a 532 nm wavelength laser at room temperature.

A series of programmed thermal desorption (TPD) experiments were conducted on an Auto Chem II 2720 chemisorbent manufactured by Micromeritics, USA, utilizing a TCD (Thermal Conductivity Detector). For the NH<sub>3</sub>- and CO<sub>2</sub>-TPD experiments, 50 mg of the catalyst was purged under a stream of argon (25 mL·min<sup>-1</sup>) at 100 °C for 1 h, and then cooled to room temperature. Following this, the sample was adsorbed at 30°C for 30 minutes in 10% NH<sub>3</sub>/Ar or 10% CO<sub>2</sub>/Ar. The temperature was then increased to

950 °C at a ramp rate of 10 °C min<sup>-1</sup>. Subsequently, the catalysts were maintained at a temperature of 950 °C for a period of 30 minutes.

Infrared testing was conducted using potassium bromide (KBr) and the catalysts by pressing approximately 5 mg of the samples with 100 mg of KBr. Surface chemical bonding of the samples was then tested using Fourier Transform Infrared Spectroscopy (FT-IR, Nicolet NEXUS 670). The spectra were obtained after 32 scans of each sample, with a resolution of 4 cm<sup>-1</sup> over a range of 400-4000 cm<sup>-1</sup>.

The electron paramagnetic resonance (EPR) spectra were collected on a ER200DSRC10/12 EPR spectrometer (Bruker, Germany).

The objective of this study is to investigate the detection of <sup>1</sup>O<sub>2</sub> and •O<sub>2</sub><sup>-</sup> using ultraviolet-visible (UV-Vis) absorption spectroscopy (UV-4802, UNICO (SHANGHAI) INSTRUMENT).

The Zr ion concentration was analyzed by an inductively coupled plasma emission spectrometer (ICP-OES).

### 3. General procedures for oxidation sulfides.

The oxidation of all thioethers was conducted in a 25 ml reaction tube. The procedure was as follows: 20 mg of catalyst, 1 mmol of sulfides, and 3 mL of methanol were sequentially added to the reaction tube and mixed well with stirring for a period of time at 30°C. Subsequently, 110  $\mu$ L (1.1 mmol) of a 30% H<sub>2</sub>O<sub>2</sub> solution was added using a microsyringe, and the reaction was carried out for 30 minutes. At the conclusion of the reaction, the reaction mixture was filtered through a nylon filter membrane with a pore size of 0.22  $\mu$ m. The conversion and selectivity were determined using gas chromatography (GC) with a flame ionization detector, while the final product was determined using gas chromatography-mass spectrometry (GC-MS), with biphenyl serving as the internal standard.

The details of the conversion and selectivity calculations are as follows:

$$m_i^* = f_i * A_i^*$$

$$m_s^* = f_s * A_s^*$$

$$f_{is} = \frac{f_i}{f_s} = \frac{m_i^* * A_s^*}{m_s^* * A_i^*}$$

$$m_i = \frac{f_i * A_i}{f_s * A_s} * m_s = f_{is} * \frac{A_i}{A_s} * m_s$$

$$n_i = \frac{m_i}{M_i}$$

$m_i^*$ -Mass of sulfide, sulfoxide and sulfone in standard solution.

$m_s^*$ -Mass of internal standard in standard solution(biphenyl).

$A_i^*$ -Gas chromatography peak area of sulfide, sulfoxide, sulfone in standard solution.

$A_s^*$ -Gas chromatography peak area of internal standard (biphenyl) in standard solution.

$m_i$ -Mass of sulfide, sulfoxide and sulfone in reaction solution.

$m_s$ -Mass of internal standard in reaction solution(biphenyl) in reaction solution.

$A_i$ -Gas chromatography peak area of sulfide, sulfoxide, sulfone in reaction solution.

$A_s$ -Gas chromatography peak area of internal standard (biphenyl) in reaction solution.

$f_{iS}$ - The relative correction factor of sulfide, sulfoxide and sulfone.

$n_{i,sulfide}$ ,  $n_{i,sulfoxide}$  and  $n_{i,sulfone}$  are calculated from the above equation.  $n$  is molar amount of sulfide before reaction (1 mmol)

$$Conversion = \frac{n - n_{i,sulfide}}{n} \times 100\%$$

$$Selectivity = \frac{n_{i,sulfoxide}}{n_{i,sulfoxide} + n_{i,sulfone}} \times 100\%$$

$$Carbon\ balance = \frac{n_{i,sulfide} + n_{i,sulfoxide} + n_{i,sulfone}}{n} \times 100\%$$

#### **4. Procedure for the catalyst recycling**

Once the reaction had reached completion, the contents of the reaction tube were transferred to a centrifuge tube. Centrifugation at 10,000 rpm for 3 min was then performed, after which a quantity of the supernatant was filtered through a nylon filter membrane with a pore size of 0.22 microns into a gas phase vial for gas phase analysis. Subsequently, the sample was washed by centrifugation at 10,000 rpm for 3 min using anhydrous ethanol on three occasions. It was then dried in an oven at 60 °C for one hour and then roasted in a muffle furnace at 300 °C for one hour. It was cooled to room temperature and used for the next run.

## 5. The kinetic measurements.

### 5.1 The kinetic experiments procedure for $\text{Mo}_{0.10}\text{Zr}_{0.8}\text{O}_x$ -500 is as follows:

1 mmol of methyl phenyl sulfide, 20 mg of  $\text{Mo}_{0.10}\text{Zr}_{0.8}\text{O}_x$ -500, and 3 mL of methanol were combined and stirred at the test temperature for several minutes to achieve equilibrium. Subsequently, 110  $\mu\text{L}$  of 30%  $\text{H}_2\text{O}_2$  solution were added. Following a 30-second reaction period, a quantity of the reaction solution was filtered using a 0.22-micron filter membrane into a gas phase vial for analysis. To determine the initial reaction rate at different reaction times, the above procedure was repeated while maintaining the reaction temperature. Samples were taken and analyzed at 60s, 90s, 120s, and 150s. Subsequently, the experimental temperature was varied, and the aforementioned methodology was repeated to assess the kinetics at 298K, 301K, 303K, 306K, and 308K, respectively.

### 5.2 The kinetic tests procedure for $\text{Mo}_{0.10}/\text{Zr}_{0.8}\text{O}_x$ -500-DIM, $\text{MoO}_3$ , and $\text{ZrO}_2$ is as follows:

The procedure remains the same as for  $\text{Mo}_{0.10}\text{Zr}_{0.8}\text{O}_x$ -500, with the exception that the starting time, the length of the interval, and the reaction temperature are not the same as for  $\text{Mo}_{0.10}\text{Zr}_{0.8}\text{O}_x$ -500.

Specifically, the  $\text{Mo}_{0.10}/\text{Zr}_{0.8}\text{O}_x$ -500-DIM was reacted at temperatures of 298K, 303K, 308K, 313K, and 318K, respectively, with a starting reaction time of 60 s at each temperature. Samples were taken and analyzed at 60 s, 120 s, 180 s, 240 s, and 300 s, respectively.

$\text{MoO}_3$  was subjected to kinetic testing at temperatures of 303K, 308K, 313K, 318K, and 323K, with an onset time of 60s at each temperature. Additionally, samples were collected and analyzed at 60s, 120s, 180s, 240s, and 300s, respectively.

The testing temperature of  $\text{ZrO}_2$  was identical to that of  $\text{Mo}_{0.10}/\text{Zr}_{0.8}\text{O}_x$ -500-DIM, and the initial reaction time was 180 seconds. Samples were collected and analyzed at 180 seconds, 360 seconds, 540 seconds, 720 seconds, and 900 seconds, respectively.

The details of the calculations are as follows:

The first order reaction kinetic equation allows for the calculation of the reaction rate constant,  $k$  ( $\text{s}^{-1}$ ). The kinetic equation for the first order reaction is as follows:



$$\ln \frac{C_0}{C} = kt$$

The Arrhenius equation is defined as follows:

$$k = Ae^{-E_a/RT}$$

The apparent activation energy of the reaction can be calculated using the Arrhenius equation. In particular, a graph is plotted with  $\ln k$  as the vertical coordinate and  $1/T(K)$  as the horizontal coordinate. The specific value of the apparent activation energy can then be derived from the resulting slope.

$$\ln k = -\frac{E_a}{RT} + \ln A$$

**Table S1** The catalyst reaction time and solvent quantity screening.

| Entry | Time (min) | Methanol (mL) | Conv.(%) <sup>b</sup> | Select.(%) <sup>b</sup> |
|-------|------------|---------------|-----------------------|-------------------------|
| 1     | 15         | 3             | 83.2                  | 93.9                    |
| 2     | 20         | 3             | 95.6                  | 93.8                    |
| 3     | 30         | 2             | 97.4                  | 93.1                    |
| 4     | 30         | 4             | 95.0                  | 93.3                    |
| 5     | 30         | 5             | 95.7                  | 93.5                    |

<sup>a</sup> Reaction conditions: sulfide (1 mM), Mo<sub>0.10</sub>/ZrO<sub>2</sub>-500 (20 mg), H<sub>2</sub>O<sub>2</sub> (1.1 mM), 30 °C, 30 min. <sup>b</sup> Conversions and selectivity were determined using gas chromatography, with biphenyl serving as the internal standard.

**Table S2** Screen various solvent types.

| Entry           | Solvent          | Conv.(%) <sup>c</sup> | Select.(%) <sup>c</sup> |
|-----------------|------------------|-----------------------|-------------------------|
| 1               | Ethanol          | 84.8                  | 92.7                    |
| 2               | n-propanol       | 87                    | 94.3                    |
| 3               | i-propanol       | 79.1                  | 94.8                    |
| 4               | n-butanol        | 93.6                  | 93.7                    |
| 5               | i-butanol        | 96.6                  | 93.1                    |
| 6               | n-Hexyl alcohol  | 91.7                  | 92.3                    |
| 7               | Acetonitrile     | 84.2                  | 81.4                    |
| 8               | THF              | 34.1                  | 82.2                    |
| 9               | Acetone          | 56.2                  | 81.5                    |
| 10              | Ethyl acetate    | 72.5                  | 87.7                    |
| 11              | Cyclohexanone    | 60                    | 86.8                    |
| 12              | 1,4-Dioxane      | 38.3                  | 95.7                    |
| 13 <sup>b</sup> | H <sub>2</sub> O | 47.6                  | 93.5                    |

<sup>a</sup> Reaction conditions: sulfide (1 mM), Catalyst (20 mg), Solvent (3 mL), H<sub>2</sub>O<sub>2</sub> (1.1 mM), 30 °C, 30 min. <sup>b</sup> The extraction procedure was conducted utilizing ethyl acetate. <sup>c</sup> Conversions and selectivity were determined using gas chromatography, with biphenyl serving as the internal standard.

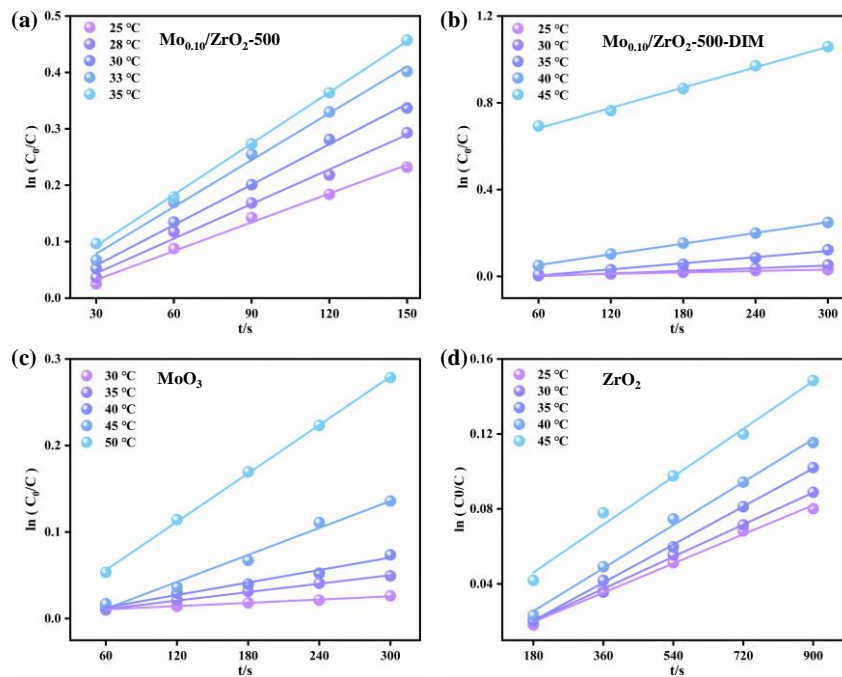

**Figure S1.** The kinetic experiments of  $\text{Mo}_{0.10}\text{Zr}_{0.8}\text{O}_x-500$  (a),  $\text{Mo}_{0.10}/\text{Zr}_{0.8}\text{O}_x-500\text{-DIM}$  (b),  $\text{MoO}_3$  (c) and  $\text{ZrO}_2$  (d).

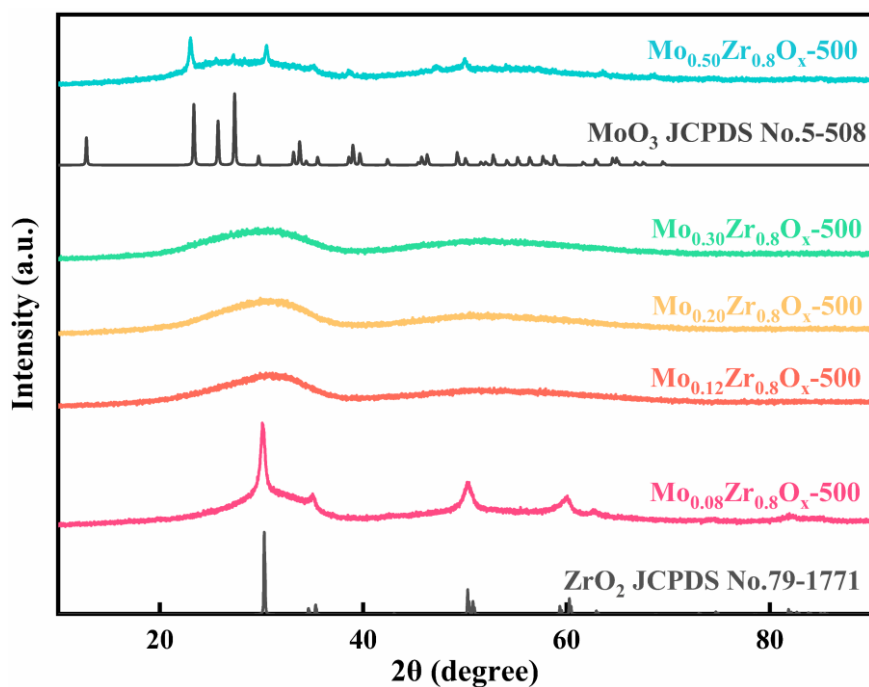

**Figure S2.** XRD patterns of  $\text{Mo}_{0.08}\text{Zr}_{0.8}\text{O}_x-500$ ,  $\text{Mo}_{0.12}\text{Zr}_{0.8}\text{O}_x-500$ ,  $\text{Mo}_{0.20}\text{Zr}_{0.8}\text{O}_x-500$ ,  $\text{Mo}_{0.30}\text{Zr}_{0.8}\text{O}_x-500$ ,  $\text{Mo}_{0.50}\text{Zr}_{0.8}\text{O}_x-500$ .

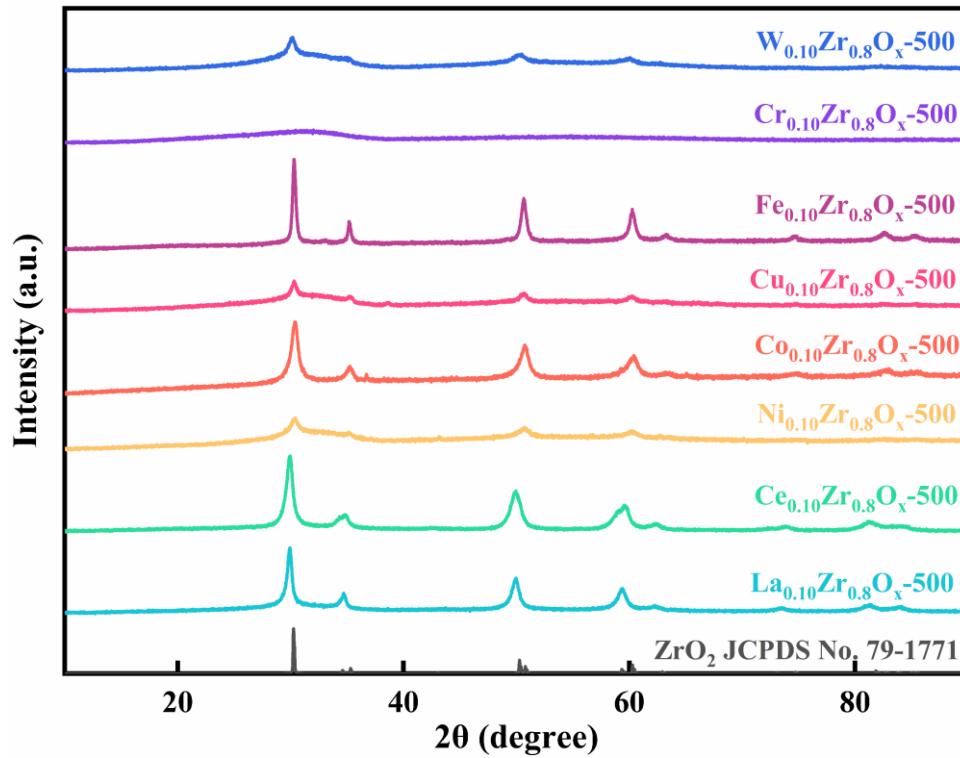

**Figure S3.** XRD patterns of W<sub>0.10</sub>Zr<sub>0.8</sub>O<sub>x</sub>-500, CrZr<sub>0.8</sub>O<sub>x</sub>-500, FeZr<sub>0.8</sub>O<sub>x</sub>-500, CuZr<sub>0.8</sub>O<sub>x</sub>-500, CoZr<sub>0.8</sub>O<sub>x</sub>-500, NiZr<sub>0.8</sub>O<sub>x</sub>-500, CeZr<sub>0.8</sub>O<sub>x</sub>-500, LaZr<sub>0.8</sub>O<sub>x</sub>-500.

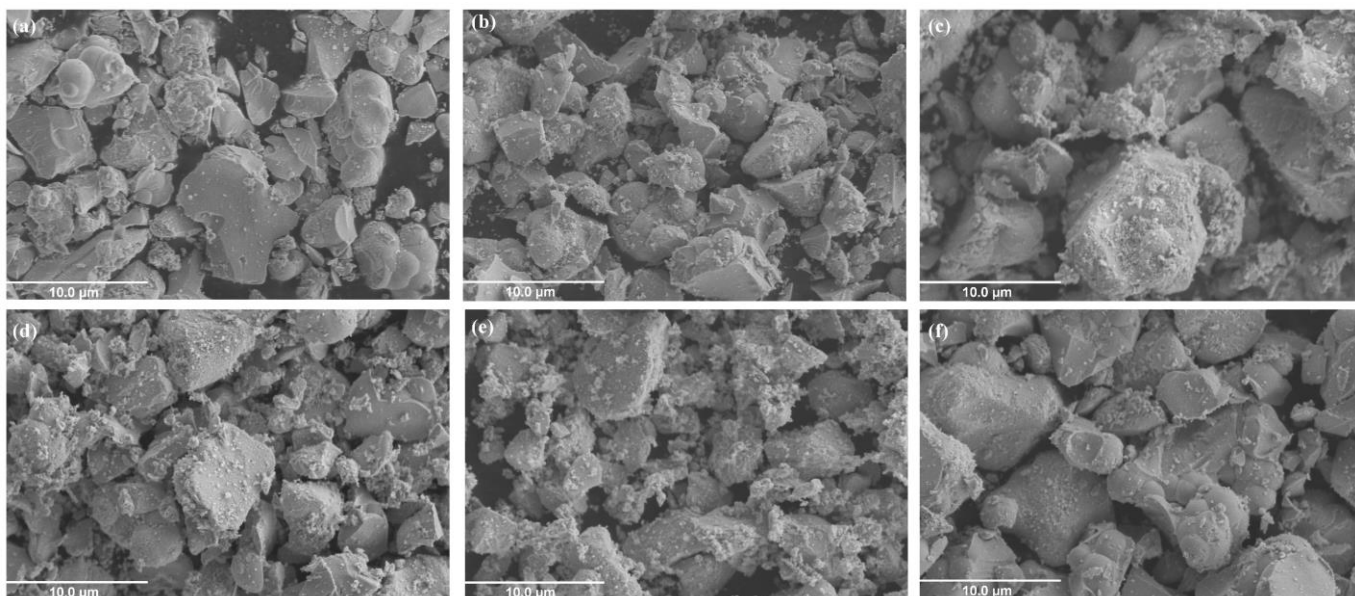

**Figure S4.** SEM images of  $\text{Mo}_{0.08}\text{Zr}_{0.8}\text{O}_x\text{-500}$ ,  $\text{Mo}_{0.10}\text{Zr}_{0.8}\text{O}_x\text{-500}$ ,  $\text{Mo}_{0.12}\text{Zr}_{0.8}\text{O}_x\text{-500}$ ,  $\text{Mo}_{0.20}\text{Zr}_{0.8}\text{O}_x\text{-500}$ ,  $\text{Mo}_{0.30}\text{Zr}_{0.8}\text{O}_x\text{-500}$ ,  $\text{Mo}_{0.50}\text{Zr}_{0.8}\text{O}_x\text{-500}$ .

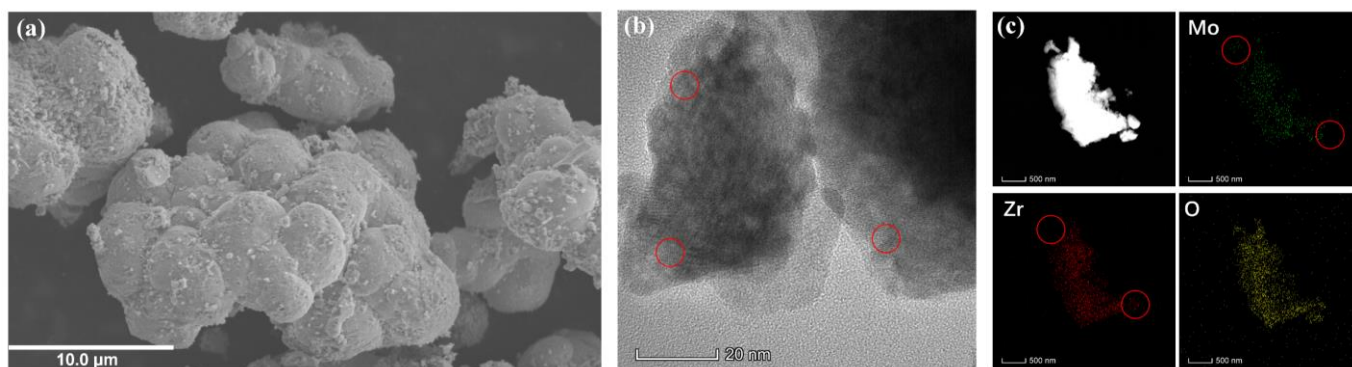

**Figure S5.** (a) SEM image of  $\text{Mo}_{0.10}/\text{Zr}_{0.8}\text{O}_x\text{-500-DIM}$ . (b) and (c) TEM image, HADDF-STEM image and EDX elemental mappings of  $\text{Mo}_{0.10}/\text{Zr}_{0.8}\text{O}_x\text{-500-DIM}$ .

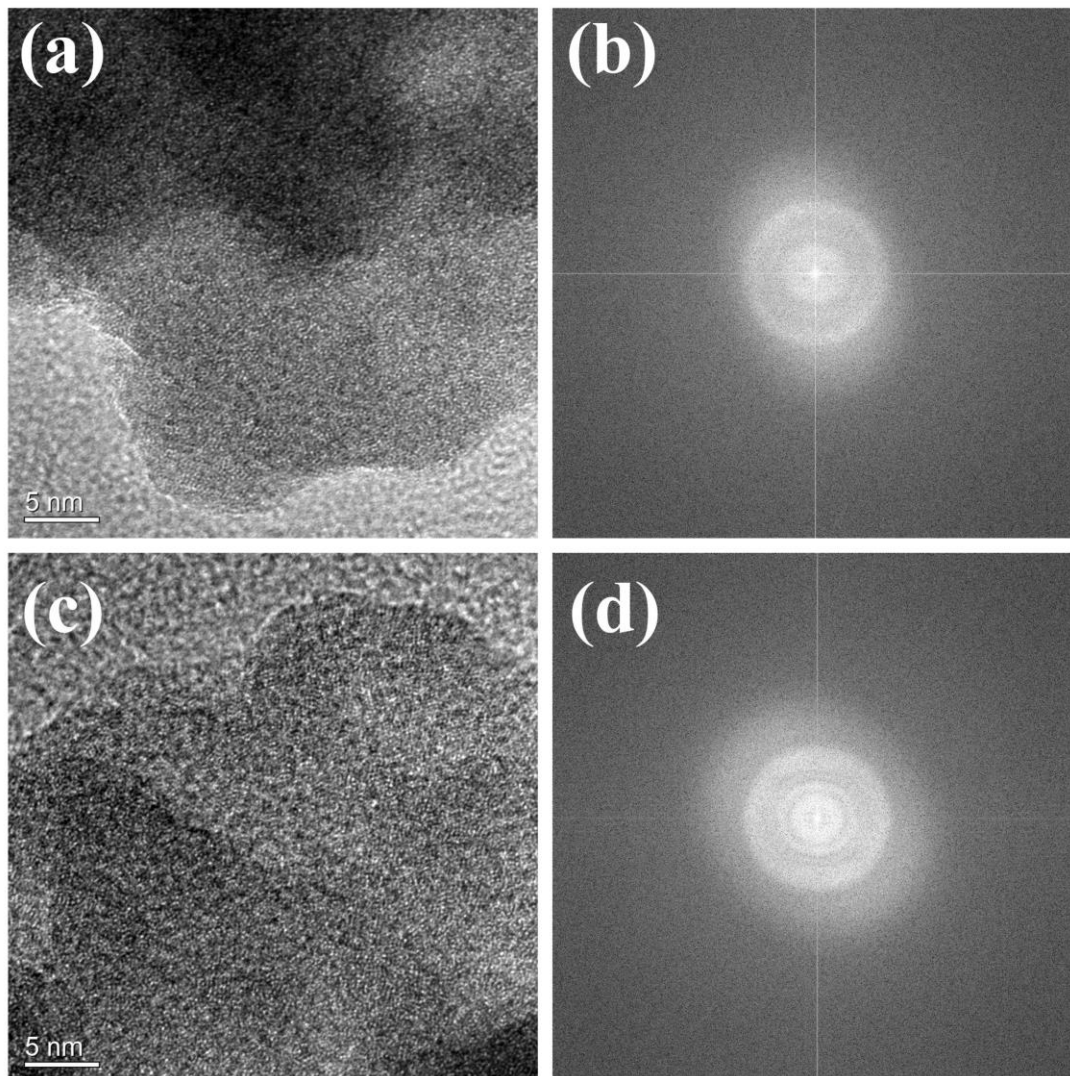

**Figure S6.** (a)-(d) HR-TEM image and electron diffraction of  $\text{Mo}_{0.10}\text{Zr}_{0.8}\text{O}_x-500$  in the selected other area.

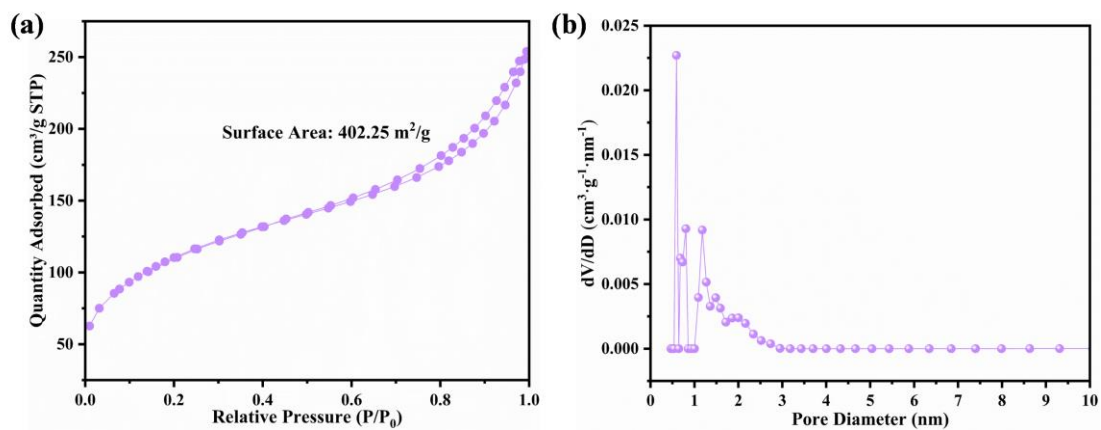

**Figure S7.** N<sub>2</sub> adsorption-desorption isotherms and the pore size distributions of Zr(OH)<sub>4</sub>.

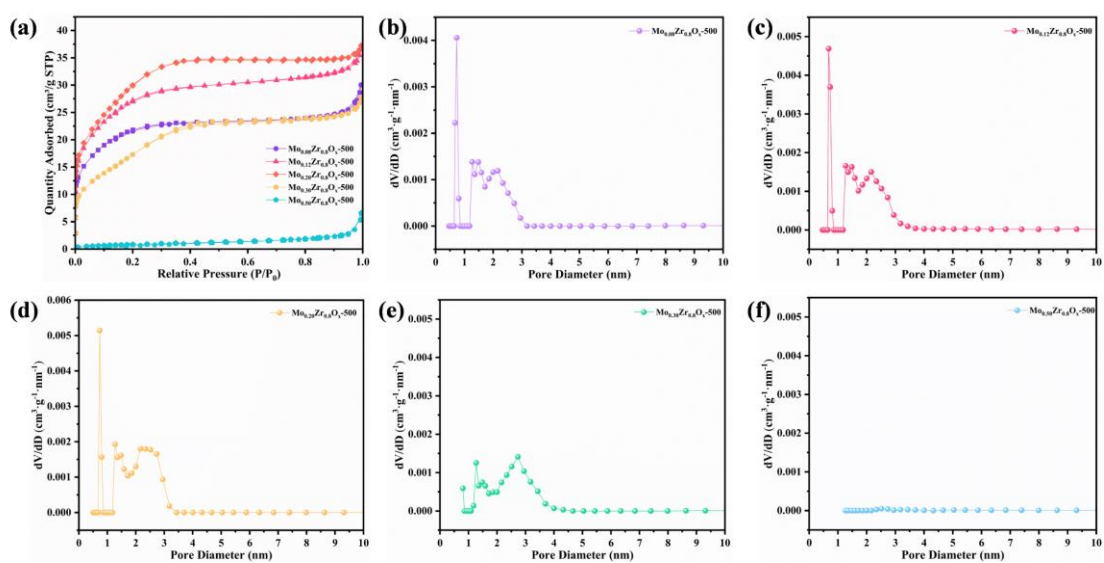

**Figure S8.** N<sub>2</sub> adsorption-desorption isotherms and the pore size distributions of Mo<sub>0.08</sub>Zr<sub>0.8</sub>O<sub>x</sub>-500, Mo<sub>0.12</sub>Zr<sub>0.8</sub>O<sub>x</sub>-500, Mo<sub>0.20</sub>Zr<sub>0.8</sub>O<sub>x</sub>-500, Mo<sub>0.30</sub>Zr<sub>0.8</sub>O<sub>x</sub>-500, Mo<sub>0.50</sub>Zr<sub>0.8</sub>O<sub>x</sub>-500.



**Table S3** Surface properties of catalysts.

| Catalysts                                                     | BET Specific Surface Area (m <sup>2</sup> /g) | BJH Desorption average pore diameter (nm) |
|---------------------------------------------------------------|-----------------------------------------------|-------------------------------------------|
| Mo <sub>0.08</sub> Zr <sub>0.8</sub> O <sub>x</sub> -500      | 74.82                                         | 4.45                                      |
| Mo <sub>0.10</sub> Zr <sub>0.8</sub> O <sub>x</sub> -500      | 114.1                                         | 4.11                                      |
| Mo <sub>0.12</sub> Zr <sub>0.8</sub> O <sub>x</sub> -500      | 95.03                                         | 3.77                                      |
| Mo <sub>0.20</sub> Zr <sub>0.8</sub> O <sub>x</sub> -500      | 110.07                                        | 2.61                                      |
| Mo <sub>0.30</sub> Zr <sub>0.8</sub> O <sub>x</sub> -500      | 66.15                                         | 2.94                                      |
| Mo <sub>0.50</sub> Zr <sub>0.8</sub> O <sub>x</sub> -500      | 2.73                                          | 7.58                                      |
| Mo <sub>0.10</sub> /Zr <sub>0.8</sub> O <sub>x</sub> -500-DIM | 1.18                                          | 12.5                                      |
| MoO <sub>3</sub>                                              | 1.27                                          | 19.08                                     |
| ZrO <sub>2</sub>                                              | 40.87                                         | 3.3                                       |

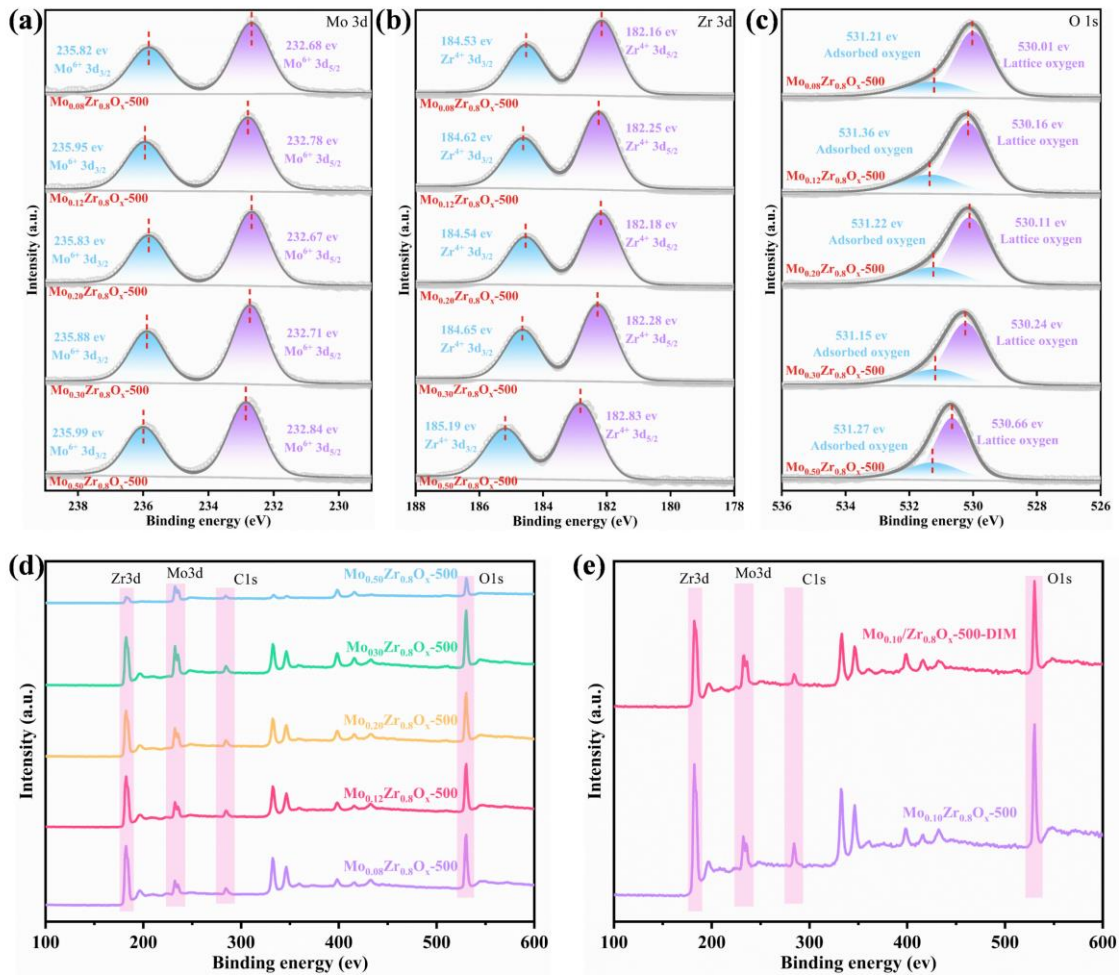

**Figure S9.** The deconvolution results of XPS spectra of  $\text{Mo}_{0.08}\text{Zr}_{0.8}\text{O}_x\text{-500}$ ,  $\text{Mo}_{0.12}\text{Zr}_{0.8}\text{O}_x\text{-500}$ ,  $\text{Mo}_{0.20}\text{Zr}_{0.8}\text{O}_x\text{-500}$ ,  $\text{Mo}_{0.30}\text{Zr}_{0.8}\text{O}_x\text{-500}$ ,  $\text{Mo}_{0.50}\text{Zr}_{0.8}\text{O}_x\text{-500}$  for Mo 3d (a), Zr 3d (b) and O 1s (c). (d) and (e) XPS survey pattern of  $\text{Mo}_{0.08}\text{Zr}_{0.8}\text{O}_x\text{-500}$ ,  $\text{Mo}_{0.10}\text{Zr}_{0.8}\text{O}_x\text{-500}$ ,  $\text{Mo}_{0.20}\text{Zr}_{0.8}\text{O}_x\text{-500}$ ,  $\text{Mo}_{0.30}\text{Zr}_{0.8}\text{O}_x\text{-500}$ ,  $\text{Mo}_{0.50}\text{Zr}_{0.8}\text{O}_x\text{-500}$  and  $\text{Mo}_{0.10}/\text{Zr}_{0.8}\text{O}_x\text{-500-DIM}$ .

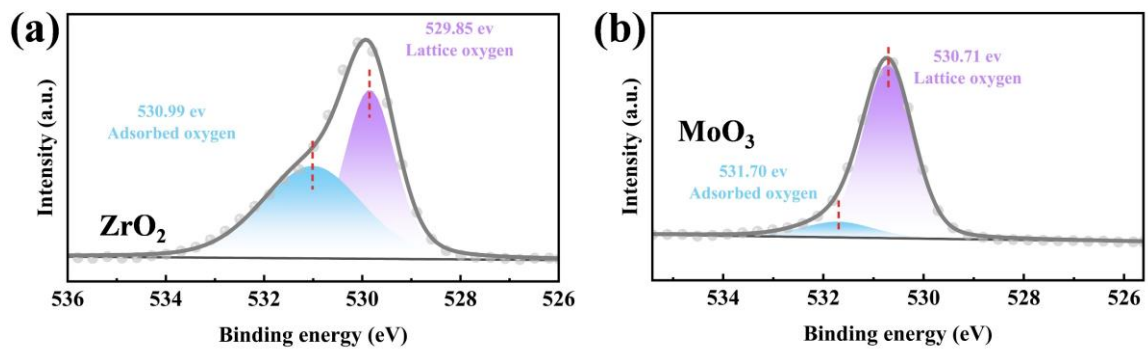

**Figure S10.** The deconvolution results of XPS spectra of  $\text{ZrO}_2$  (a) and  $\text{MoO}_3$  (b) for O 1s.

**Table S4** A comparison of the elemental contents derived from ICP-OES and XPS.

| Catalysts                                                     | ICP-OES        | XPS         |      |                  |                  |
|---------------------------------------------------------------|----------------|-------------|------|------------------|------------------|
|                                                               | Mo Content (%) | Content (%) |      |                  |                  |
|                                                               |                | Zr          | Mo   | O                |                  |
|                                                               |                |             |      | O <sub>ads</sub> | O <sub>lat</sub> |
| Mo <sub>0.08</sub> Zr <sub>0.8</sub> O <sub>x</sub> -500      | 8.15           | 52.9        | 12.6 | 9.9              | 24.6             |
| Mo <sub>0.10</sub> Zr <sub>0.8</sub> O <sub>x</sub> -500      | 10.34          | 51.1        | 14.1 | 10.0             | 24.8             |
| Mo <sub>0.12</sub> Zr <sub>0.8</sub> O <sub>x</sub> -500      | 12.50          | 50.1        | 15.9 | 9.7              | 24.3             |
| Mo <sub>0.20</sub> Zr <sub>0.8</sub> O <sub>x</sub> -500      | 18.2           | 45.2        | 20.8 | 9.7              | 24.3             |
| Mo <sub>0.30</sub> Zr <sub>0.8</sub> O <sub>x</sub> -500      | 22.65          | 40.8        | 25.7 | 9.4              | 24.1             |
| Mo <sub>0.50</sub> Zr <sub>0.8</sub> O <sub>x</sub> -500      | 30.56          | 18.2        | 48.1 | 10.3             | 23.4             |
| Mo <sub>0.10</sub> /Zr <sub>0.8</sub> O <sub>x</sub> -500-DIM | 9.36           | 46.8        | 19.7 | 17.7             | 15.8             |

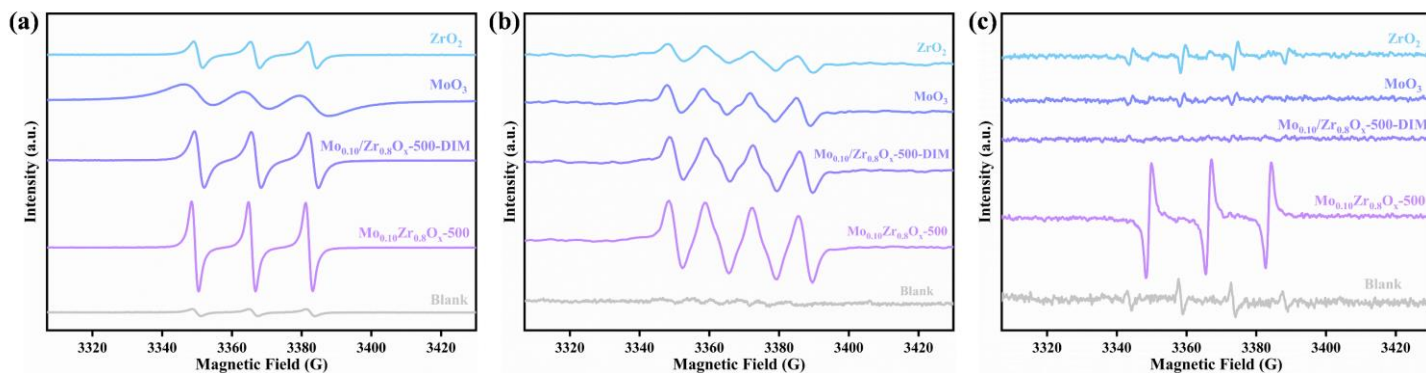

**Figure S11.** EPR spectra: TEMP trapped  $^1\text{O}_2$  (a), DMPO- $\text{CH}_3\text{OH}$  trapped  $\bullet\text{O}_2^-$  (EPR signals of four large and two small peaks) (b) and DMPO- $\text{H}_2\text{O}$  trapped  $\bullet\text{OH}$  (EPR signal intensity ratio: 1:2:2:1) (c) in the presence of  $\text{Mo}_{0.10}\text{Zr}_{0.8}\text{O}_x-500$ ,  $\text{Mo}_{0.10}\text{Zr}_{0.8}\text{O}_x-500\text{-DIM}$ ,  $\text{MoO}_3$  and  $\text{ZrO}_2$ .

**Text S1 The procedure for the ROS quenching experiments is as follows:**

20 mg of  $\text{Mo}_{0.10}\text{Zr}_{0.8}\text{O}_x-500$ , 1 mmol of methyl phenyl sulfide, and 3 mL of methanol were sequentially added to a 25 mL reaction tube. Subsequently, 0.25 mmol of p-benzoquinone, 50  $\mu\text{L}$  of TEMP, and 0.5 mL of tert-butanol were added to different batches of the experiments to capture  $\bullet\text{O}_2^-$ ,  $^1\text{O}_2$ , and  $\bullet\text{OH}$ , respectively. All other experimental conditions and subsequent treatments were conducted in accordance with standard procedures.

**Text S2 The procedure for the EPR trapping experiments is as follows:**

In order to obtain precise results, each capture experiment was conducted under quantitative conditions.

In the  $^1\text{O}_2$  capture experiment, 10 mg of catalyst was initially added to a 7 mL centrifuge tube, followed by the injection of 3 mL of methanol. Subsequently, 50  $\mu\text{L}$  of the spin trapping agent TEMP was added, followed by the rapid addition of 50  $\mu\text{L}$  of a 30% hydrogen peroxide solution. Finally, the centrifuge tube was vigorously shaken for 1 min. Subsequently, the reaction solution was filtered through a nylon filter membrane with a pore size of 0.22  $\mu\text{m}$  into another centrifuge tube. The reaction solution was then aspirated using a capillary tube and sealed, and finally the EPR test was performed.

In the  $\cdot\text{O}_2^-$  and  $\cdot\text{OH}$  trapping experiments, 6.25 mg/mL of DMPO- $\text{CH}_3\text{OH}$  solution and 6.25 mg/mL of DMPO- $\text{H}_2\text{O}$  solution were prepared in advance for the trapping of  $\cdot\text{O}_2^-$  and  $\cdot\text{OH}$ , respectively. The operational parameters were maintained throughout the experiment, with the exception of the replacement of TEMP and methanol in the  $^1\text{O}_2$  capture experiments with the corresponding trapping agents for  $\cdot\text{O}_2^-$  and  $\cdot\text{OH}$ .

The parameters of the EPR instrument utilized in the trapping experiment are as follows: center field strength of 3362 G, sweep width of 150 G,  $^1\text{O}_2$  receiver gain of  $2 \times 10^2$ , and  $\cdot\text{O}_2^-$  and  $\cdot\text{OH}$  receiver gain of  $2 \times 10^4$ .

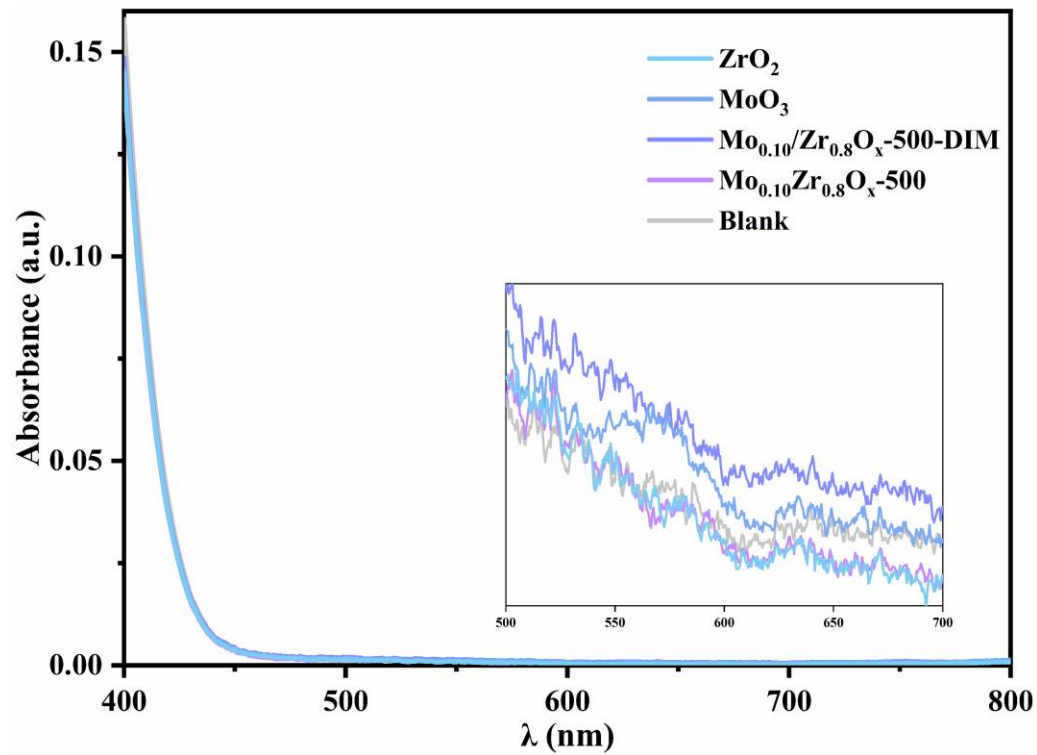

**Figure S12.** UV-vis absorption spectroscopy of mono-formazan in Mo<sub>0.10</sub>Zr<sub>0.8</sub>O<sub>x</sub>-500/H<sub>2</sub>O<sub>2</sub> system.

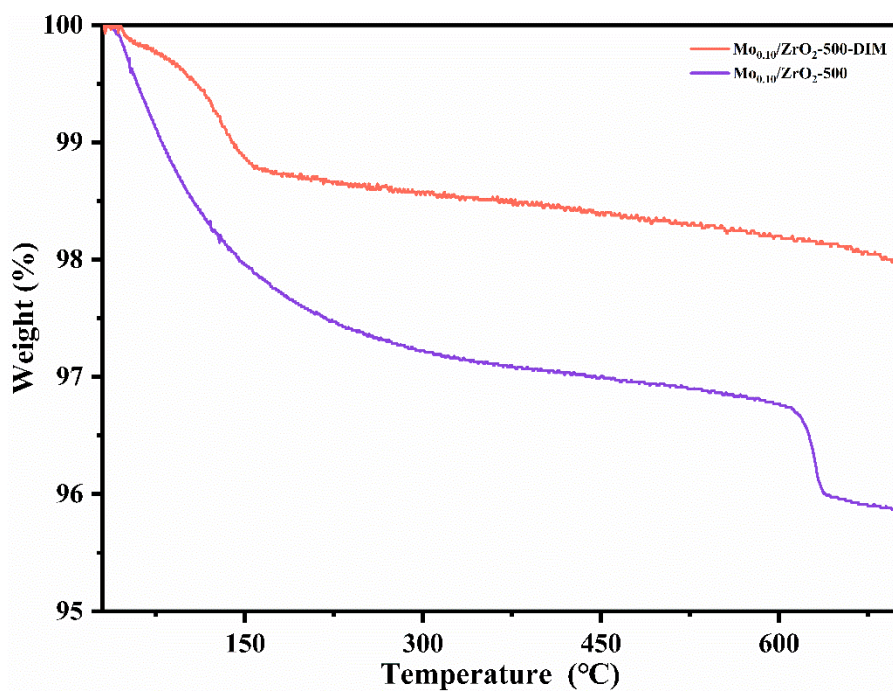

**Figure S13.** TGA curve of Mo<sub>0.10</sub>Zr<sub>0.8</sub>O<sub>x</sub>-500 and Mo<sub>0.10</sub>Zr<sub>0.8</sub>O<sub>x</sub>-500-DIM.

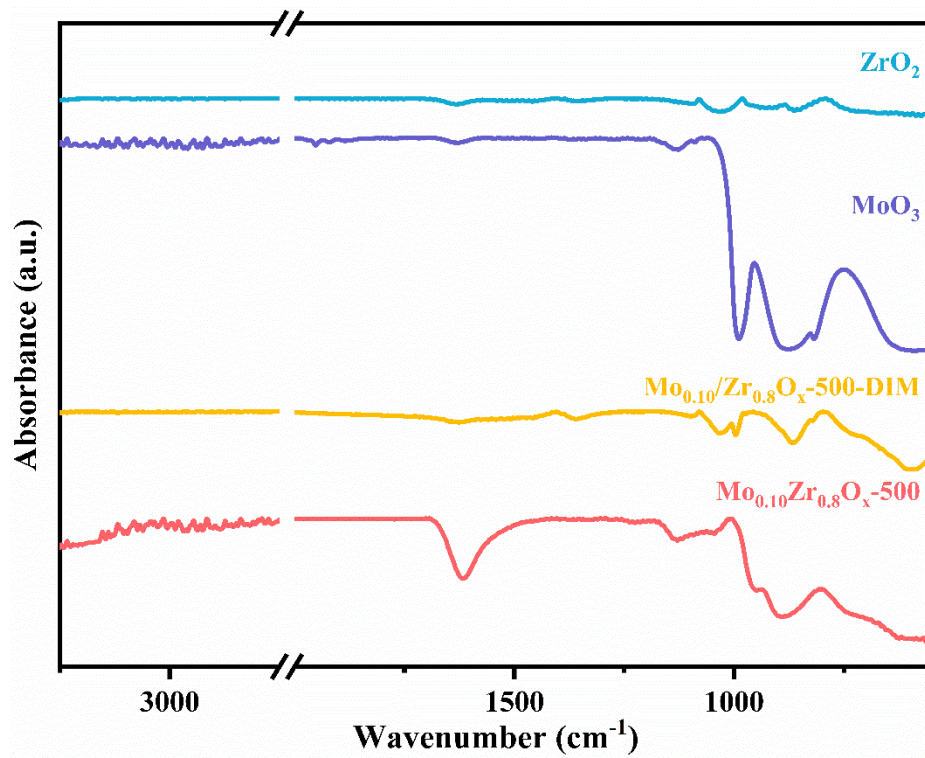

Figure S14. FT-IR spectra of  $\text{Mo}_{0.10}\text{Zr}_{0.8}\text{O}_x\text{-500}$ ,  $\text{Mo}_{0.10}/\text{Zr}_{0.8}\text{O}_x\text{-500-DIM}$ ,  $\text{MoO}_3$  and  $\text{ZrO}_2$ .

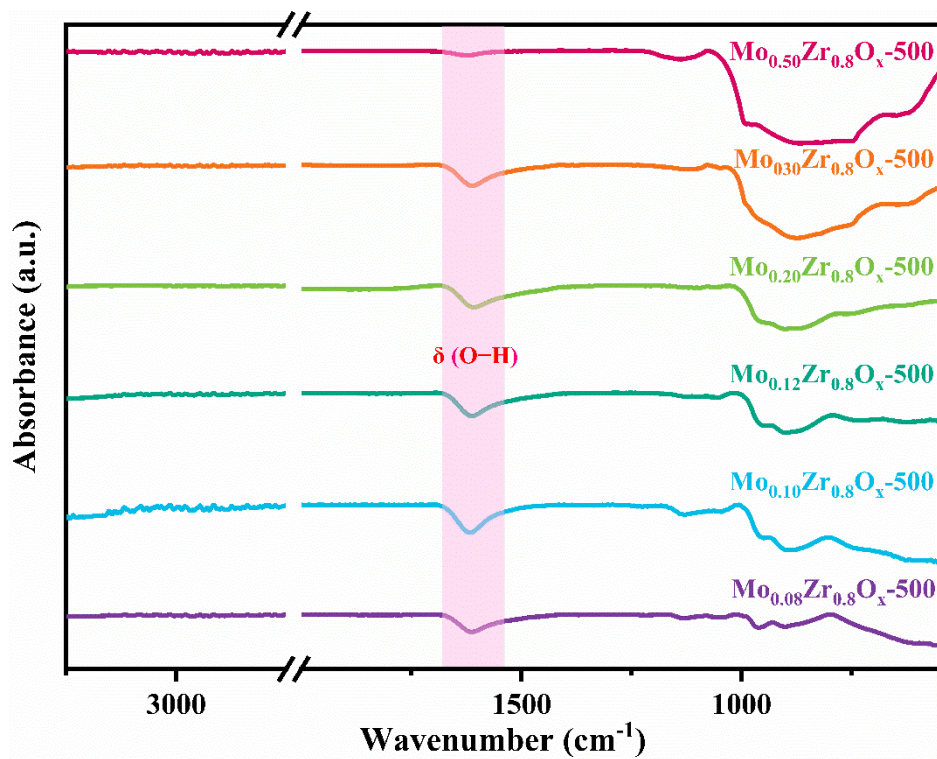

Figure S15. FT-IR spectra of  $\text{Mo}_{0.08}\text{Zr}_{0.8}\text{O}_x\text{-500}$ ,  $\text{Mo}_{0.10}\text{Zr}_{0.8}\text{O}_x\text{-500}$ ,  $\text{Mo}_{0.12}\text{Zr}_{0.8}\text{O}_x\text{-500}$ ,  $\text{Mo}_{0.20}\text{Zr}_{0.8}\text{O}_x\text{-500}$ ,  $\text{Mo}_{0.30}\text{Zr}_{0.8}\text{O}_x\text{-500}$ ,  $\text{Mo}_{0.50}\text{Zr}_{0.8}\text{O}_x\text{-500}$

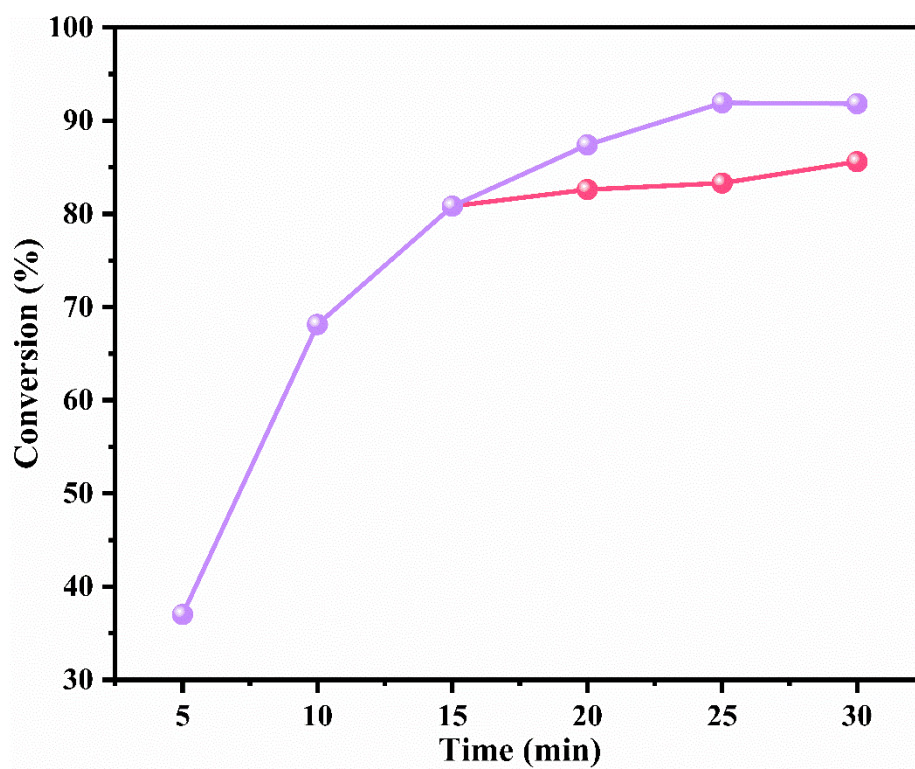

**Figure S16.** The “hot filtration” experiment.



**Table S5** Comparing of Mo<sub>0.10</sub>Zr<sub>0.8</sub>O<sub>x</sub>-500 catalyst with reported catalyst for sulfide oxidation reaction.

| Catalyst                                                 | Solvent                                 | T (°C) | Time (h) | Oxidant                       | Conv. (%) | Select. (%) | Yield (%) | Ref.      |
|----------------------------------------------------------|-----------------------------------------|--------|----------|-------------------------------|-----------|-------------|-----------|-----------|
| Mo <sub>0.10</sub> Zr <sub>0.8</sub> O <sub>x</sub> -500 | CH <sub>3</sub> OH                      | 30     | 0.5      | H <sub>2</sub> O <sub>2</sub> | 98.2      | 93.5        |           | This work |
| C8-AP-WO <sub>4</sub> = @SBA-15                          | H <sub>2</sub> O:CH <sub>3</sub> CN=1:1 | 30     | 1.5      | H <sub>2</sub> O <sub>2</sub> |           |             | 93        | 1         |
| CuL2@Y                                                   | CH <sub>3</sub> CN                      | 50     | 6        | H <sub>2</sub> O <sub>2</sub> | 81.95     | 100         |           | 2         |
| OMS-1-0.40(OAc)                                          | PhCF <sub>3</sub>                       | 90     | 4        | O <sub>2</sub> (0.1 MPa)      |           | 91          | 87        | 3         |
| PNbMoSi                                                  | EtOH                                    | 25     | 4        | H <sub>2</sub> O <sub>2</sub> | 92        | 94          |           | 4         |
| Fe-TiO <sub>2</sub>                                      | CTAB<br>EDC                             | 60     | 0.5      | H <sub>2</sub> O <sub>2</sub> | 80        | 76          |           | 5         |
| Cu-Ni-Co                                                 | CH <sub>3</sub> CN                      | 40     | 25       | H <sub>2</sub> O <sub>2</sub> |           |             | 97        | 6         |
| BaRuO <sub>3</sub>                                       | t-BuOH                                  | 40     | 24       | O <sub>2</sub> (1 MPa)        |           | 84          | 92        | 7         |
| CoFe <sub>2</sub> O <sub>4</sub> /Trp/Dy                 | /                                       | r.t.   | 50       | H <sub>2</sub> O <sub>2</sub> |           |             | 92        | 8         |
| CeO <sub>2</sub> -Au nanowires                           | CH <sub>3</sub> CN                      | 50     | 3        | H <sub>2</sub> O <sub>2</sub> | 54        | 100         |           | 9         |
| Zr-POMs                                                  | CH <sub>3</sub> CN                      | 27     | 0.5      | H <sub>2</sub> O <sub>2</sub> | 82        | 89          |           | 10        |
| La <sub>2</sub> O <sub>3</sub>                           | Ethyl acetate                           | reflux | 5        | t-BuOOH                       |           |             | 88        | 11        |
| ov-Bi <sub>2</sub> O <sub>3</sub>                        | Hexane                                  | 25     | 10       | O <sub>2</sub> bubble         | 86        | 96          |           | 12        |

### Text S3

According to ICP-OES analysis, the Mo ion content of the reaction filtrate was 9.575 mg/L.

i.e. In the reaction filtrate:

$$\text{Mo Mass} = 9.575 \text{ mg/L} \times 3 \text{ mL} = 0.02873 \text{ mg}$$

$$\text{Mo Content} = \frac{0.02873 \text{ mg}}{20 \text{ mg}} = 0.0014$$

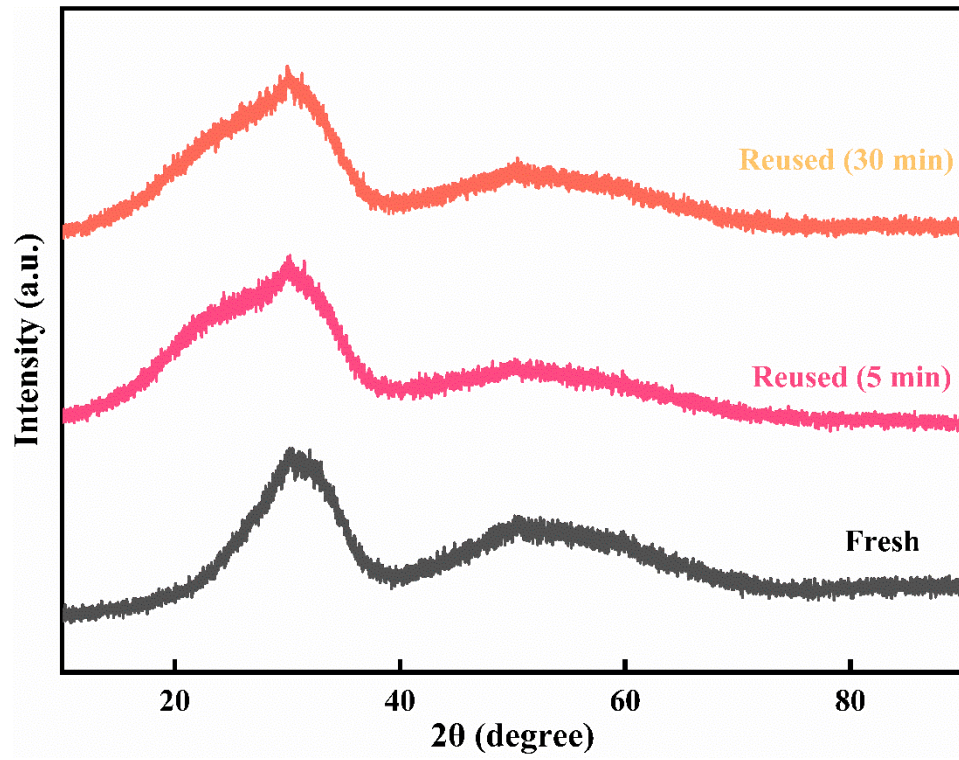

**Figure S17.** XRD patterns of fresh and reused catalysts (5 min and 30 min).

## References

- 1 B. Karimi and M. Khorasani, Selectivity adjustment of SBA-15 based tungstate catalyst in oxidation of sulfides by incorporating a hydrophobic organic group inside the mesochannels, *ACS Catal.*, 2013, **3**, 1657-1664.
- 2 B. K. Kundu, M. Das, R. Ganguly, P. A. Bhoje and S. Mukhopadhyay, Role of zeolite encapsulated Cu(II) complexes in electron transfer as well as peroxy radical intermediates formation during oxidation of thioanisole, *J. Catal.*, 2020, **389**, 305-316.
- 3 M. Koutani, E. Hayashi, K. Kamata and M. Hara, Synthesis and aerobic oxidation catalysis of mesoporous todorokite-type manganese oxide nanoparticles by crystallization of precursors, *J. Am. Chem. Soc.*, 2022, **144**, 14090-14100.
- 4 M. B. Colombo Migliorero, V. Palermo, G. P. Romanelli and P. G. Vázquez, New niobium heteropolyacid included in a silica/alumina matrix: Application in selective sulfoxidation, *Catalysis Today*, 2021, **372**, 89-97.
- 5 G. D. Yadav and R. V. Sharma, Synthesis, characterization and applications of highly active and robust sulfated Fe-TiO<sub>2</sub> catalyst (ICT-3) with superior redox and acidic properties, *J. Catal.*, 2014, **311**, 121-128.
- 6 F. Hosseini-Eshbala, A. Sedrpoushan, M. N. Dehdashti, B. Breit, F. Mohanazadeh and H. Veisi, Needle ball-like nanostructured mixed Cu-Ni-Co oxides: Synthesis, characterization and application to the selective oxidation of sulfides to sulfoxides, *Mater. Sci. Eng., C*, 2019, **103**, 109814pp.
- 7 K. Kamata, K. Sugahara, Y. Kato, S. Muratsugu, Y. Kumagai, F. Oba and M. Hara, Heterogeneously catalyzed aerobic oxidation of sulfides with a BaRuO<sub>3</sub> nanoperovskite, *ACS Appl. Mater. Interfaces*, 2018, **10**, 23792-23801.
- 8 N. Moeini, S. Molaei and M. Ghadermazi, Dysprosium (III) supported on CoFe<sub>2</sub>O<sub>4</sub> MNPs as a heterogeneous catalyst for the selective oxidation of sulfides and synthesis of symmetrical disulfides, *J. Mol. Struct.*, 2021, **1246**, 131071.
- 9 T. F. Rosado, M. P. Teixeira, L. C. Moraes, L. A. d. Silva, A. V. Pontes-Silva, J. G. Taylor, I. C. de Freitas, D. C. de Oliveira, J. Gardener, G. Solorzano, T. V. Alves, M. F. Venancio, M. I. P. da Silva, E. Brocchi, H. V. Fajardo and A. G. M. da Silva, Synergistic effect between CeO<sub>2</sub> nanowires and gold NPs over the activity and selectivity in the oxidation of thioanisole, *Appl. Catal., A*, 2021, **613**, 118010.
- 10 N. V. Maksimchuk, V. Y. Evtushok, O. V. Zalomaeva, G. M. Maksimov, I. D. Ivanchikova, Y. A. Chesalov, I. V. Eltsov, P. A. Abramov, T. S. Glazneva, V. V. Yanshole, O. A. Kholdeeva, R. J. Errington, A. Sole-Daura, J. M. Poblet and J. J. Carbo, Activation of H<sub>2</sub>O<sub>2</sub> over Zr(IV). Insights from model studies on Zr-monosubstituted lindqvist tungstates, *ACS Catal.*, 2021, **11**, 10589-10603.
- 11 M. Mandal and D. Chakraborty, Kinetic investigation on the highly efficient and selective oxidation of sulfides to sulfoxides and sulfones with t-BuOOH catalyzed by La<sub>2</sub>O<sub>3</sub>, *RSC Adv.*, 2015, **5**, 12111-12122.
- 12 J. Wang, X. Xu, Y. Liu, Z. Wang, P. Wang, Z. Zheng, H. Cheng, Y. Dai and B. Huang, Oxygen-vacancy-enhanced singlet oxygen production for selective photocatalytic oxidation, *ChemSusChem*, 2020, **13**, 3488-3494.
